# Supplementary material
Source: HighWire-hosted journal article supplement (https://genome.cshlp.org/content/suppl/2005/04/19/15.5.737)
Supplement: GeneSorterSupp.pdf [file GeneSorterSupp.pdf]

## Exploring relationships and mining data with the UCSC Gene Sorter Supplementary Data

**Table R.1** All columns currently available in the Gene Sorter for the human gene set.

| Column Name       | Column Description                                                    |
|-------------------|-----------------------------------------------------------------------|
| Name              | Gene Name/Select Gene                                                 |
| Swiss-Prot        | Swiss-Prot Protein Display ID                                         |
| SP Acc            | Swiss-Prot Protein Accession                                          |
| RefSeq            | NCBI RefSeq Gene Accession                                            |
| LocusLink         | NCBI LocusLink ID                                                     |
| GenBank           | GenBank mRNA Accession                                                |
| Ensembl           | Ensembl Transcript ID                                                 |
| HInv              | HInv ID                                                               |
| GNF Atlas 2 ID    | ID of Associated GNF Atlas 2 Expression Data                          |
| U133Plus2 ID      | ID of Associated Affymetrix U133 Plus 2.0 Expression Data             |
| U133 ID           | ID of Associated Affymetrix U133 Expression Data                      |
| U95 ID            | ID of Associated Affymetrix U95 Expression Data                       |
| GNF Atlas 2       | GNF Expression Atlas 2 Data from U133A and GNF1H Chips                |
| Max GNF Atlas 2   | Maximum Expression Value of GNF Expression Atlas 2                    |
| GNF Atlas 2 Delta | Normalized Difference in GNF Expression Atlas 2 from Selected Gene    |
| GNF U95           | GNF Expression Atlas 1 Human Data on Affy U95 Chips                   |
| Max GNF U95       | Maximum Expression Value of GNF Expression Atlas 1                    |
| GNF U95 Delta     | Normalized Difference in GNF Atlas 1 Expression from Selected Gene    |
| GNF Atlas1 Delta  | Normalized Difference in GNF Atlas 1 Expression from Selected Gene    |
| BLASTP Bits       | NCBI Blastp Bit Score                                                 |
| BLASTP E-Value    | NCBI Blastp E-Value                                                   |
| %ID               | NCBI Blastp Percent Identity                                          |
| 5' UTR Fold       | 5' UTR Fold Energy (Estimated kcal/mol)                               |
| 3' UTR Fold       | 3' UTR Fold Energy (Estimated kcal/mol)                               |
| Genome Position   | Genome Position/Link to Genome Browser                                |
| Coding SNPs       | Simple Nucleotide Polymorphisms in Coding Regions                     |
| Exon Count        | Number of Exons (Including Non-Coding)                                |
| Mouse             | Mouse Ortholog (Best Blastp Hit to UCSC Known mm3)                    |
| Rat               | Rat Ortholog (Best Blastp Hit to UCSC Known rn3)                      |
| Zebrafish         | <i>Danio rerio</i> Ortholog (Best Blastp Hit to Ensembl)              |
| Drosophila        | <i>D. melanogaster</i> Ortholog (Best Blastp Hit to FlyBase Proteins) |
| C. elegans        | <i>C. elegans</i> Ortholog (Best Blastp Hit to WormPep)               |
| Yeast             | <i>Saccharomyces cerevisiae</i> Ortholog (Best Blastp Hit to RefSeq)  |
| Pfam Domains      | Protein Family Domain Structure                                       |
| Superfamily       | Protein Superfamily Assignments                                       |
| PDB               | Protein Data Bank                                                     |
| Gene Ontology     | Gene Ontology (GO) Terms Associated with Gene                         |
| Description       | Short description Line/Link to Details Page                           |

**Table R.2** All sort options currently available in the Gene Sorter for the human gene set.

| Sort Type                    | Sort Description                                                                    |
|------------------------------|-------------------------------------------------------------------------------------|
| Expression (GNF Atlas2)      | Difference in expression with selected gene according to GNF Gene Expression Atlas2 |
| Expression (GNF Atlas1)      | Difference in expression with selected gene according to GNF Gene Expression Atlas1 |
| Protein Homology - BLASTP    | BLASTP E-value with selected gene                                                   |
| Protein Homology - Rankprop  | Rankprop similarity score with selected gene                                        |
| Protein Homology - PSI-BLAST | BLASTP E-value with selected gene                                                   |
| Pfam Similarity              | Number of Pfam domains shared with selected gene                                    |
| Gene Distance                | Distance in base pairs from selected gene                                           |
| Chromosome                   | Ordered by chromosome position                                                      |
| Name Similarity              | Number of leading characters in name that match selected gene name                  |
| Alphabetical                 | Alphabetical order of name                                                          |
| GO Similarity                | Number of shared gene ontology terms                                                |

**Table M.1** Column types in columnDb.ra. The first six column types are general purpose; there are many columns of each of these types. The remaining column types, which are more specialized, have only a single instance of each.

| Type         | Function                                                                                                                   |
|--------------|----------------------------------------------------------------------------------------------------------------------------|
| lookup       | Displays a string for each gene based on a simple database table lookup. Only a single value is associated with each gene. |
| association  | Displays multiple strings for each gene based on an arbitrary SQL query                                                    |
| distance     | Looks up and displays a floating point number based on two genes – the selected gene and the gene for the current row.     |
| expRatio     | Shows microarray expression ratios.                                                                                        |
| expMulti     | Shows microarray data as absolute or expression.                                                                           |
| num          | Displays the row number in the table. Usually the leftmost column.                                                         |
| knownName    | Displays biological name of gene if available. Clicking here selects gene.                                                 |
| acc          | Displays the gene ID.                                                                                                      |
| knownPos     | Displays position of gene in genome. Hyperlinks to Genome Browser.                                                         |
| knownDetails | Displays a sentence about gene. Hyperlinks to details page.                                                                |
| pfam         | Shows Pfam domain. Can filter on domain name or Pfam ID.                                                                   |
| go           | Shows GO term. Can filter on term or term accession.                                                                       |

**Table M.2** Sort types in orderDb.ra. The expression similarity and protein homology based sorts are instances of the pair type. Pfam and GO similarity are instances of the association type.

| Type           | Function                                                                                                                                                           |
|----------------|--------------------------------------------------------------------------------------------------------------------------------------------------------------------|
| pair           | Looks up floating point distance value in database table using ID of selected gene and ID of gene to sort.                                                         |
| group          | Partitions genes into non-overlapping groups. Genes in same group as selected gene have a distance of one; other genes have an infinite distance.                  |
| association    | Distance is based on the number of terms in an association table that the gene shares with the selected gene.                                                      |
| geneDistance   | Distance is the number of bases between middle of gene and middle of selected gene. Genes on other chromosomes have infinite distance.                             |
| nameSimilarity | Distance is based on the number of letters -- starting from the beginning of the biological gene name -- that are the same between the gene and the selected gene. |
| abc            | Sorts genes alphabetically by biological name. The selected gene is irrelevant in this ordering.                                                                   |
| genomePos      | Sorts genes by chromosome and position on chromosome. The selected gene is irrelevant in the ordering.                                                             |

**Table M.3** The methods of the column object.

| Method         | Purpose                                                                                                                                     |
|----------------|---------------------------------------------------------------------------------------------------------------------------------------------|
| exists         | Returns true if all tables necessary to display column are available.                                                                       |
| cellVal        | Returns string value for a particular gene.                                                                                                 |
| cellPrint      | Prints out cell in html table for a particular gene.                                                                                        |
| labelPrint     | Prints column label in html table.                                                                                                          |
| tableColumns   | Returns how many html columns this logical column uses. (Expression data sets with many tissues use multiple html columns for readability.) |
| configControls | Prints out controls for this column on configuration page.                                                                                  |
| simpleSearch   | Called when user inputs text in search box. Returns a searchResult structure for each gene that matches search in this column.              |
| filterControls | Prints out controls for this column on filter page.                                                                                         |
| advFilter      | Return a subset of the genes that passes the filter in this column.                                                                         |
